# Supplementary material for: sChemNET: a deep learning framework for predicting small molecules targeting microRNA function
Source: PubMed Central journal article supplement — Nat Commun. 2024 Oct 23;15:9149. doi: 10.1038/s41467-024-49813-w (PMC11500171; doi:10.1038/s41467-024-49813-w), 2024-10-23
Supplement: 41467_2024_49813_MOESM3_ESM.pdf [file 41467_2024_49813_MOESM3_ESM.pdf]

File name: Supplementary Datasets 1

Description: Predictions obtained with sChemNET for Homo sapiens' miRNAs.

File name: Supplementary Datasets 2

Description: Manual curation of the type of cell line involved in the training dataset from SM2miR 2015.
